# Supplementary material for: Modification of DSSC Based on Polymer Composite Gel Electrolyte with Copper Oxide Nanochain by Shape Effect
Source: MDPI journal article supplement (doi:10.3390/polym14163426), 2022-08-22
Supplement: s1 [file s1]

### Supplementary files

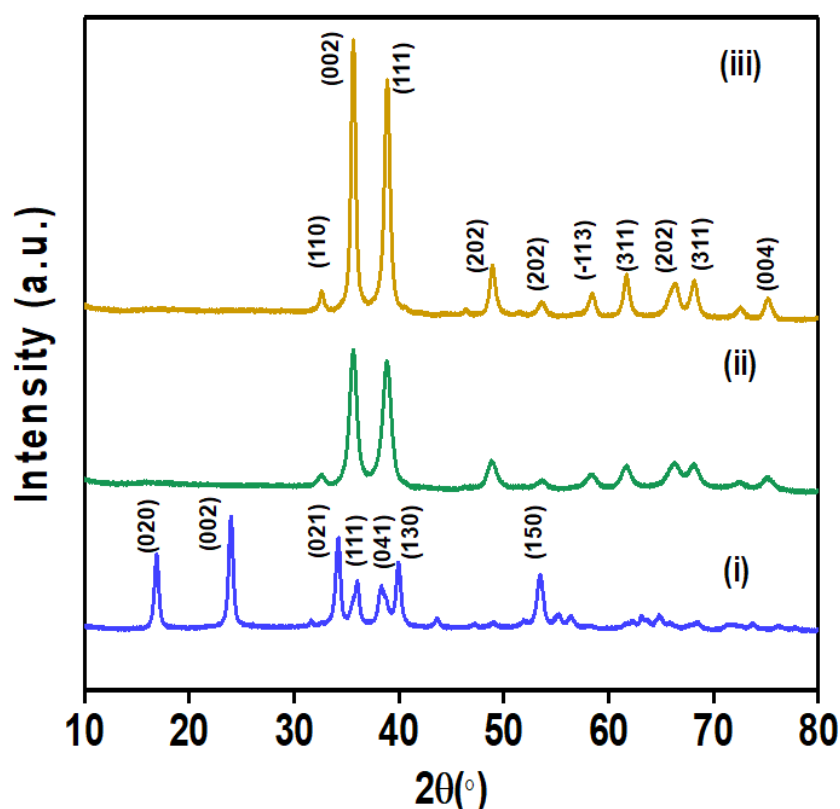

**Figure S1:** XRD pattern for (i) Cu(OH)<sub>2</sub> nanofiller, (ii) CuO-200 nanofiller and (iii) CuO-500 nanofiller.

The effect of calcination temperature on the structure of the samples is studied via XRD diffractograms as shown in Figure 1 and Figure S1. Cu(OH)<sub>2</sub> shows a series of sharp peaks which indicates its crystalline structure at  $16.8^{\circ}$ ,  $23.9^{\circ}$ ,  $34.2^{\circ}$ ,  $35.9^{\circ}$ ,  $38.3^{\circ}$ ,  $40.5^{\circ}$ , and  $53.3^{\circ}$ . These peaks can be indexed to (020), (021), (002), (111), (041), (130) and (150) planes of orthorhombic phase Cu(OH)<sub>2</sub> (JCPDS card No. 13-0420), respectively [22]. After calcination, different patterns were observed for CuO-200, CuO 350 and CuO-500 which signifies that Cu(OH)<sub>2</sub> was successfully transformed into the CuO. The peaks of CuO are located at  $32.6^{\circ}$ ,  $35.6^{\circ}$ ,  $38.8^{\circ}$ ,  $48.8^{\circ}$ ,  $58.3^{\circ}$ ,  $61.6^{\circ}$ ,  $66.3^{\circ}$ ,  $68.1^{\circ}$ ,  $72.4^{\circ}$ , and  $75.1^{\circ}$  in  $2\theta$ , corresponding to (110), (002), (111), (202), (202), (-113), (311), (202), (311) and (004) planes of monoclinic CuO (JCPDS No. 48-1548), respectively [23].

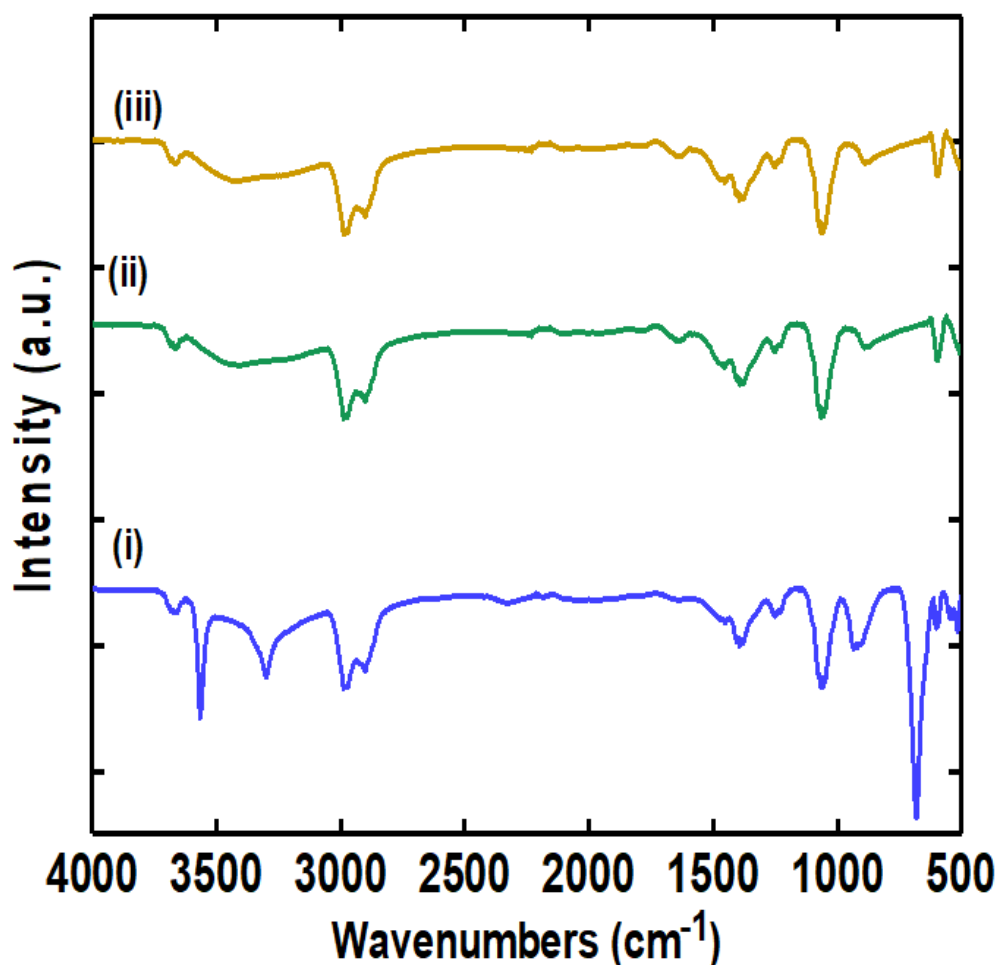

**Figure S2:** FTIR spectra for (i)  $\text{Cu(OH)}_2$  nanofiller, (ii)  $\text{CuO-200}$  nanofiller and (iii)  $\text{CuO-500}$  nanofiller

Figure S2(i) shows that there are the appearance of stretching modes of O-H groups in  $\text{Cu(OH)}_2$  at the peaks of  $3568\text{ cm}^{-1}$  and  $3305\text{ cm}^{-1}$ . The bands at  $1380$  and  $1060\text{ cm}^{-1}$  indicate the bending mode of the absorbed water in as-prepared of  $\text{Cu(OH)}_2$  powder [27]. While, at  $933\text{ cm}^{-1}$  attributes to the C-O stretching vibration of metal cation,  $\text{Cu}^{2+}$  in  $\text{Cu(OH)}_2$ .

Figure S2 (ii) and (iii) shows that the bands at  $3440$  and  $1628\text{ cm}^{-1}$  for  $\text{CuO-200}$  and  $\text{CuO-500}$  correspond to the O-H group of water. While the absorption bands observed at  $594\text{ cm}^{-1}$  is referring to Cu-O stretching modes [28]. Thus, the FTIR results confirm the formation of CuO at all calcination temperatures.

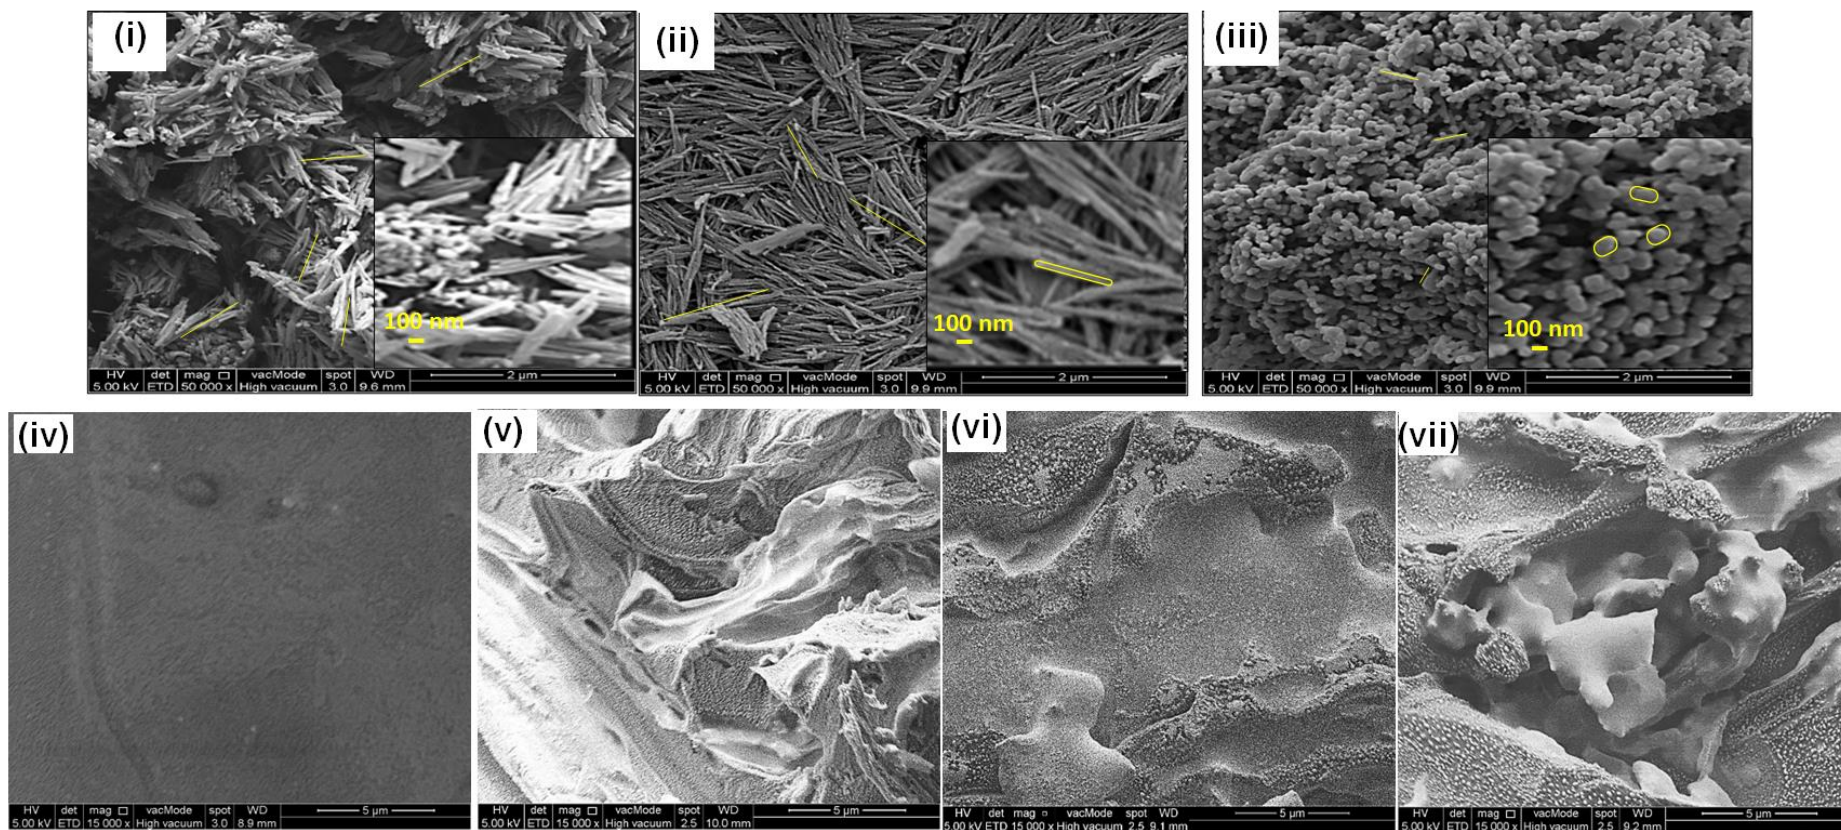

**Figure S3:** FESEM micrographs for (i)  $\text{Cu}(\text{OH})_2$  nanofiller, (ii)  $\text{CuO}$ -200 nanofiller, (iii)  $\text{CuO}$ -500 nanofiller, (iv) Pure  $\text{P}(\text{VB-co-VA-co-VAc})$ , (v)  $\text{TCu}(\text{OH})_2$ , (vi)  $\text{TCuO}$ -200 and (vii)  $\text{TCuO}$ -500.

**Table S1:** Size and shape of Cu(OH) and CuO nanofiller at different calcination temperature.

| Nanofiller          | Size of nanofiller                                                                       | Shape of naofiller                |
|---------------------|------------------------------------------------------------------------------------------|-----------------------------------|
| Cu(OH) <sub>2</sub> | Average length: 0.75 µm, diameter: 45 nm                                                 | nanorod                           |
| CuO-200             | Average length: 1.12 µm, diameter: 45-50 nm                                              | nanorod                           |
| CuO-350             | Range of length: 1.58 consist of small nanorods (average length: 227 nm, diameter:91 nm) | Interconnected chain of small rod |
| CuO-500             | diameter: 182 nm                                                                         | sphere                            |
